# Supplementary material
Source: Springer Nature journal article supplement (https://www.springermedizin.de/resource/supplementary/12993_2011_347_MOESM3_ESM.pdf/9617594)
Supplement: MOESM3 [file 9617594]

Ramped object recognition  
contrast threshold (%)

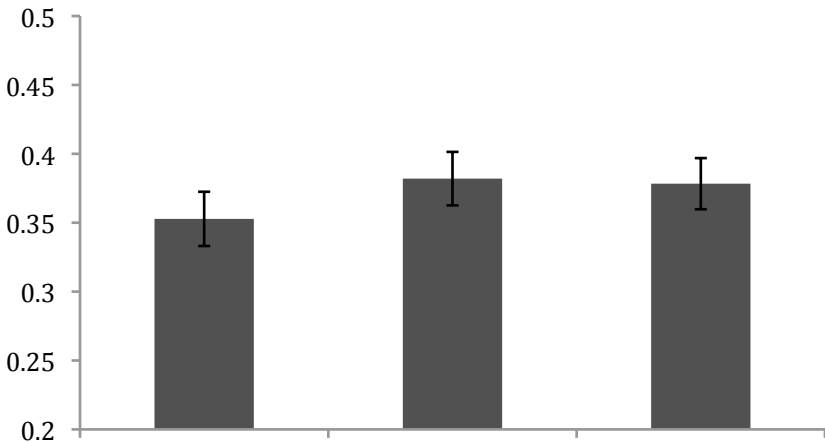

Good MC Group

Middle MC Group

Poor MC Group

Motion Coherence (MC) Groups
